# Supplementary material for: The effects of interacting with fish in aquariums on human health and well-being: A systematic review
Source: PubMed Central journal article supplement (PMC6663029; doi:10.1371/journal.pone.0220524), 2019-07-29
Supplement: pone.0220524.s003.pdf [file pone.0220524.s003.pdf]

**Reviewer:**

**Date:**

**Full study reference:**

|                                   |                                                                                                                                                        |
|-----------------------------------|--------------------------------------------------------------------------------------------------------------------------------------------------------|
| <b>General</b>                    |                                                                                                                                                        |
| Author/year                       |                                                                                                                                                        |
| Publication type and source       |                                                                                                                                                        |
| Country                           |                                                                                                                                                        |
| Funding                           |                                                                                                                                                        |
| Conflict of interest              |                                                                                                                                                        |
| <b>Study details</b>              |                                                                                                                                                        |
| Aim/objectives                    |                                                                                                                                                        |
| Dates of data collection          |                                                                                                                                                        |
| Theoretical framework             |                                                                                                                                                        |
| <b>Methods</b>                    |                                                                                                                                                        |
| Study design                      |                                                                                                                                                        |
| Participant recruitment           |                                                                                                                                                        |
| Participants                      | <i>Population:</i><br><i>Age:</i><br><i>Sex:</i><br><i>Ethnicity:</i><br><i>SES:</i><br><i>Total sample size:</i><br><i>Sample size per condition:</i> |
| Intervention/Independent Variable |                                                                                                                                                        |
| Control                           |                                                                                                                                                        |
| Allocation to conditions          |                                                                                                                                                        |
| Setting/context                   |                                                                                                                                                        |
| Primary outcomes                  | <i>Psychological outcomes (anxiety, depression, behaviour change, social interaction, etc.):</i>                                                       |

|                                                                   |                                                                                                  |
|-------------------------------------------------------------------|--------------------------------------------------------------------------------------------------|
|                                                                   | <i>Physiological outcomes (heart rate, blood pressure, motor skills etc.):</i>                   |
| Secondary outcomes<br>(adverse events, animal welfare, attitudes) |                                                                                                  |
| Brief study description                                           |                                                                                                  |
| <b>Results</b>                                                    |                                                                                                  |
| Method of analysis                                                |                                                                                                  |
| Primary outcomes                                                  | <i>Psychological outcomes (anxiety, depression, behaviour change, social interaction, etc.):</i> |
|                                                                   | <i>Physiological outcomes (heart rate, blood pressure, motor skills etc.):</i>                   |
| Secondary outcomes<br>(adverse events, animal welfare, attitudes) |                                                                                                  |
| <b>Author conclusions:</b>                                        |                                                                                                  |
| <b>Reviewer comments:</b>                                         |                                                                                                  |
